# Supplementary material for: Can ocean community production and respiration be determined by measuring high-frequency oxygen profiles from autonomous floats?
Source: Copernicus journal article supplement (doi:10.5194/bg-2020-119), 2020-04-08
Supplement: Supplementary file [file bg-2020-119-RC1-supplement.pdf]

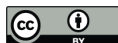

# Can ocean community production and respiration be determined by measuring high-frequency oxygen profiles from autonomous floats?

Christopher Gordon<sup>1</sup>, Katja Fennel<sup>1</sup>, Clark Richards<sup>2</sup>, Lynn K. Shay<sup>3</sup>, and Jodi K. Brewster<sup>3</sup>

<sup>1</sup>Department of Oceanography, Dalhousie University, 1355 Oxford Street, Halifax B3H 4R2, Nova Scotia, Canada

<sup>2</sup>Bedford Institute of Oceanography, Dartmouth, Nova Scotia, Canada

<sup>3</sup>Department of Ocean Sciences, Rosenstiel School of Marine Sciences, University of Miami, Miami, Florida, USA

Correspondence to: Katja Fennel (Katja.Fennel@dal.ca)

**Abstract.** Oceanic primary production forms the basis of the marine food web and provides a pathway for carbon sequestration. Despite its importance, spatial and temporal variations of primary production are poorly observed, in large part because the traditional measurement techniques are laborious and require the presence of a ship. More efficient methods are emerging that take advantage of miniaturized sensors integrated into autonomous platforms such as gliders and profiling floats. One such method relies on determining the diurnal cycle of dissolved oxygen in the mixed layer and has been applied successfully to measurements from gliders and mixed layer floats. This study is the first documented attempt to estimate primary production from diurnal oxygen changes measured by Argo-type profiling floats, thus accounting for the whole euphotic zone. We first present a novel method for correcting measurement errors that result from the relatively slow response time of the oxygen optode sensor. This correction relies on an *in-situ* determination of the sensor's effective response time. The method is conceptually straightforward and requires only two minor adjustments in current Argo data transmission protocols: 1) transmission of measurement time stamps, and 2) occasional transmission of downcasts in addition to upcasts. Next, we present oxygen profiles collected by 10 profiling floats in the northern Gulf of Mexico, evaluate whether community production and respiration can be detected, and show evidence of internal oscillations influencing the diurnal oxygen signal. Our results show that profiling floats are capable of measuring diurnal oxygen variations although the confounding influence of physical processes does not permit a reliable estimation of biological rates in our data set. We offer suggestions for recognizing and removing the confounding signals.

## 1 Introduction

Oceanic primary production forms the basis of the oceanic food web and is a major component of the global carbon cycle by providing a pathway for carbon sequestration in the ocean interior. Although primary production is intrinsic to understanding biogeochemical dynamics in the ocean, its temporal and spatial variations are not well observed. Historically, it has been estimated by performing bottle incubations using <sup>14</sup>C (Steeman-Nielsen, 1952). These incubations require substantial effort and the presence of a ship, while only providing point estimates of production. Satellites estimate production on the global scale, but rely on assumptions about the photosynthesis-irradiance relationship, the vertical structure of biomass and global regressions of observed productivity with sea surface temperature, all with inherent limitations.



25 Both of the above methods quantify net primary production (NPP), defined as the total rate of photosynthetically fixed carbon  
minus autotrophic respiration. The total fixation of carbon is referred to as gross primary production (GPP). Other definitions  
of primary production consider losses by the whole planktonic community including autotrophic and heterotrophic respiration.  
Community respiration (R) is the total rate of carbon respired by autotrophs and heterotrophs. The balance between GPP and R  
is referred to as net community production ( $NCP = GPP - R$ ), where a positive (negative) NCP indicates net production (net  
30 respiration). A positive NCP, i.e. net biomass production by the planktonic community, is expressed as an increase in biomass  
or in exported carbon or a combination of both.

NCP in the mixed layer can be estimated by measuring the ratio of dissolved oxygen to dissolved argon ( $[O_2]/[Ar]$ ) (Kaiser  
et al., 2005; Cassar et al., 2009; Hamme et al., 2012; Tortell et al., 2014). The two gases have similar physical properties with  
regard to their solubility, but Ar is biologically inactive while oxygen is produced and consumed by production and respiration.  
35 The ratio of  $[O_2]/[Ar]$  can thus be used to partition changes in oxygen into physical and biological components, where the  
biological component represents NCP over the timescale of mixed layer gas exchange, usually about 10 to 30 days. This  
technique offers a better time-space resolution than  $^{14}C$  incubations as it can be applied in high-precision and continuously to  
a steaming ship's seawater flow-through, making it a good candidate for deployment on ships of opportunity, but does require  
the presence of a ship and is limited to the mixed layer.

40 The emergence and integration of miniaturized biogeochemical sensors into autonomous platforms have opened new av-  
enues for measuring production. Numerous studies have used particulate beam attenuation (Cullen et al., 1992; Claustre et al.,  
1999; Kinkade et al., 1999; Gernez et al., 2010; Dall'Olmo et al., 2011; Omand et al., 2017; White et al., 2017) or dissolved  
oxygen (Caffrey, 2003; Riser and Johnson, 2008; Nicholson et al., 2015; Briggs et al., 2018) to estimate production from such  
platforms. Riser and Johnson (2008) measured oxygen profiles with profiling floats every 10 days in the subtropical Pacific  
45 Ocean. Oxygen below the mixed layer showed a steady increase throughout the stratified period. The slope of the oxygen  
buildup allowed estimation of seasonally averaged NCP below the mixed layer. GPP and R have also been estimated from di-  
urnal cycles of oxygen within the mixed layer observed by gliders (Nicholson et al., 2015) and mixed layer floats (Briggs et al.,  
2018). A similar approach has been applied to diurnal cycles of beam-c measurements from an underway ship flow-through  
(White et al., 2017). In Nicholson et al. (2015), approximately 14 glider profiles per day were averaged over a study period  
50 of 110 days to obtain the average diurnal cycle of dissolved oxygen within the mixed layer. The techniques applied in White  
et al. (2017) and Briggs et al. (2018) instead used continuous measurements to observe daily cycles. In Briggs et al. (2018), by  
measuring the decline of dissolved oxygen through the night, the respiration rate R was determined. Then, by measuring the  
increase of oxygen during the day and subtracting R, GPP was calculated.

These previous studies are encouraging, but required large averaging periods or neglected at least some portion of the water  
55 column where production is likely to occur (e.g., White et al., 2017; Briggs et al., 2018) or both (Riser and Johnson, 2008;  
Nicholson et al., 2015). Here, we test whether diurnal cycles of dissolved oxygen can be observed with sufficient accuracy  
from Argo-type floats to estimate daily productivity for the whole euphotic zone. We use measurements from ten floats that  
were deployed in the Gulf of Mexico in 2017 and profiled continuously for several days. This work most directly extends  
previous research with autonomous floats by Briggs et al. (2018) but, by using profiling rather than mixed-layer floats, explicitly



60 considers the entire euphotic zone. To answer the overarching question whether GPP, R and thus NCP can be estimated from continuously profiling floats, two sets of specific questions are addressed: 1) Are the floats capable of sampling at the rate and accuracy required to resolve diurnal scale changes in oxygen? and 2) What are the primary physical or biological drivers of oxygen change in the upper ocean at our study site? Are there physical processes that can confound the biological signal? If yes, can the two be separated?

65 The first set of questions addresses technical aspects of the measurement. It is necessary to determine whether profiling floats are able to properly resolve the diurnal signal. While oxygen optodes have been shown to be reliable and stable when deployed on autonomous floats (Tengberg et al., 2006; Gruber et al., 2010), with only a weak drift of less than 1% per year (Bushinsky et al., 2016; Bittig and Körtzinger, 2016), they require pressure (Bittig et al., 2015), in-air gain (Johnson et al., 2015; Nicholson and Feen, 2017) and response time (Bittig et al., 2014, 2018) corrections. The ability to reliably perform these corrections will be paramount to measuring the diurnal oxygen signal.

The second set of research questions addresses the environmental side of measuring production autonomously *in-situ*. The floats were deployed in the dynamic but oligotrophic shelf break region in the northern Gulf of Mexico where primary production is low. Given this, the biological signal is much weaker than during the first demonstration of diurnal oxygen measurement by Briggs et al. (2018) in the North Atlantic Ocean, which was conducted during the spring bloom.

10 This manuscript is structured as follows. In Section 2.1, float functionality and deployment, and sensor calibration and data processing are described. The first set of research questions is addressed in Section 3, where the mathematical formalism underlying the optode measurement, a method for determining the sensor response time *in situ*, and an error analysis are presented. The second set of research questions is addressed in Section 4, where possible drivers of oxygen variability in the upper ocean are explored including physical processes that can influence dissolved oxygen in the euphotic zone. Section 5 contains conclusions and recommendations.

## 2 Methods

### 2.1 Float functionality and deployment

In May 2017, 10 autonomous ElectroMagnetic-Autonomous Profiling EXplorer (EM-APEX) floats were deployed in the northern Gulf of Mexico near the Mississippi delta (Figure 1, Shay et al., 2019). The floats were equipped with a Seabird Scientific CTD, 2 electromagnetic current velocity sensors, a WETLabs EcoPuck bio-optical triplet which measures chlorophyll fluorescence, optical backscattering and coloured dissolved organic matter (CDOM) fluorescence, and an Aanderaa 4330 oxygen optode. This study primarily uses data from the oxygen optode and CTD.

25 The floats operated in two different profiling modes: 1) the traditional “park-and-profile” mode where floats surfaced once every 5 to 10 days and drifted at 1000 m depth in between profiles, and 2) the “continuous” mode where floats profiled the top 1000 m continuously, pausing only to transmit data at the surface following an upcast (this resulted in one profile about every 3 hours). No depth binning was performed on the sensor data. The profiling mode of the floats was changed via two-way Iridium communication.

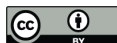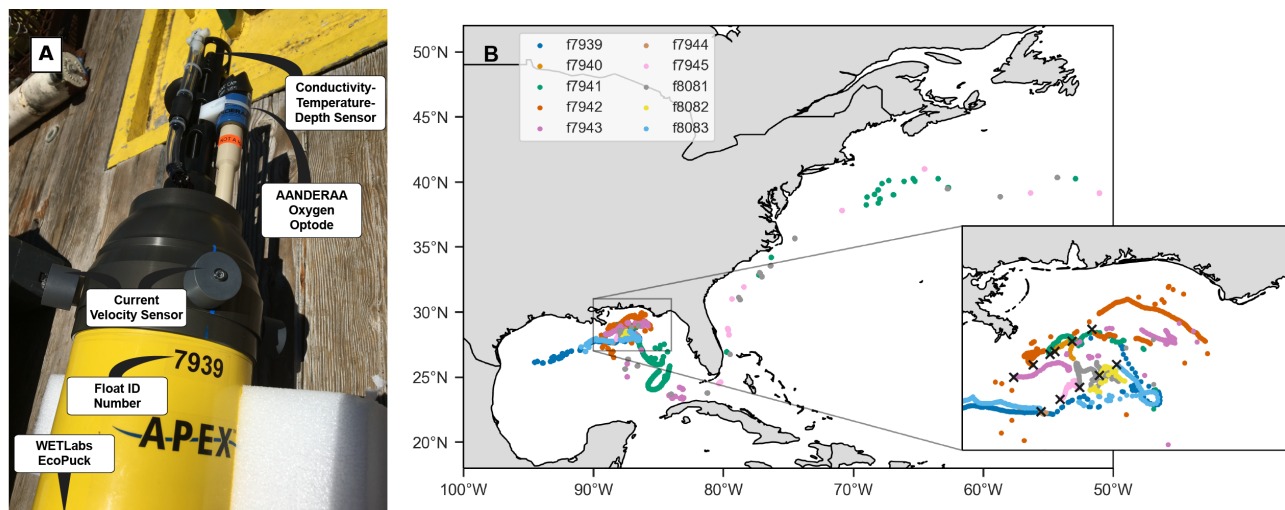

**Figure 1.** a) Photo of float f7939 with the sensors labelled. b) Map of the 10 deployment stations (black crosses in inset) and float trajectories.

The floats were deployed in a grid (Figure 1b inset), and a set of discrete shipboard measurements was taken in conjunction with most deployments. The floats were initially set to continuous mode for about one week. After that, the floats operated in park-and-profile mode until hurricanes Irma and Nate passed through the Gulf and the floats were switched back to continuous mode for about 2 weeks. The dataset thus contains 3 periods of high-frequency sampling (after deployment and during the passage of the two hurricanes). While none of the floats was located directly within the path of the hurricanes, most of them experienced a sea state affected by high winds.

Three floats failed less than one month into the deployment (see Table 1). Location data suggest that during continuous mode sampling these floats drifted near or onto shelf areas with low-density surface waters for which they were not properly ballasted. Without the required buoyancy to surface, the floats would have been trapped below the surface. One of the other floats also encountered a low-salinity plume and was not surfacing and transmitting data for a few days, but resumed functioning normally again later. Two floats transmitted data until the end of 2017, and the remaining five floats operated until summer of 2018, with the last transmission occurring on June 2, 2018. Three floats were entrained into the Loop Current and left the Gulf, eventually ending up in the North Atlantic (Figure 1b). In total, the 10-float fleet measured over 2500 profiles, over 1600 of these during continuous-mode sampling.

## 2.2 Sensor calibration and data processing

At most deployment stations, a CTD cast to 2000 m, or to the bottom if shallower, was performed using a SeaBird SBE 9 CTD for comparison between ship measurements and the first profile recorded by each float. For two floats, the CTD cast was not carried out because of rough seas. The CTD and float profiles agree within an average Root Mean Square Difference (RMSD) of 0.16°C and 0.02 ( $N = 8$ ) for temperature and salinity respectively. The floats slightly underestimated temperature



**Table 1.** Float number, total number of profiles measured by each float ( $N_{prof}$ ) and subset of profiles measured in continuous mode ( $N_{cont}$ ), date of first and last transmitted profile, and RMSD and bias of float temperature ( $^{\circ}\text{C}$ ) and salinity relative to ship CTD.

| Float | $N_{prof}$ | $N_{cont}$ | Start Date | End Date   |
|-------|------------|------------|------------|------------|
| f7939 | 302        | 194        | 02-05-2017 | 29-05-2018 |
| f7940 | 83         | 64         | 02-05-2017 | 24-05-2017 |
| f7941 | 415        | 189        | 03-05-2017 | 29-05-2018 |
| f7942 | 481        | 384        | 03-05-2017 | 02-06-2018 |
| f7943 | 384        | 269        | 03-05-2017 | 05-03-2018 |
| f7944 | 70         | 55         | 03-05-2017 | 19-05-2017 |
| f7945 | 186        | 55         | 04-05-2017 | 30-05-2017 |
| f8081 | 322        | 206        | 06-05-2017 | 30-05-2018 |
| f8082 | 101        | 28         | 06-05-2017 | 18-08-2017 |
| f8083 | 312        | 213        | 07-05-2017 | 31-10-2017 |
|       | $T_{RMSD}$ | $T_{bias}$ | $S_{RMSD}$ | $S_{bias}$ |
| f7939 | 0.17       | -0.13      | 0.020      | -0.005     |
| f7940 | 0.14       | -0.10      | 0.016      | -0.009     |
| f7941 | -          | -          | -          | -          |
| f7942 | 0.15       | -0.11      | 0.018      | -0.008     |
| f7943 | 0.16       | -0.10      | 0.016      | -0.002     |
| f7944 | 0.17       | -0.13      | 0.026      | -0.013     |
| f7945 | -          | -          | -          | -          |
| f8081 | 0.11       | -0.10      | 0.015      | -0.011     |
| f8082 | 0.15       | -0.12      | 0.023      | -0.017     |
| f8083 | 0.21       | -0.16      | 0.031      | -0.023     |

and salinity with biases of  $-0.12^{\circ}\text{C}$  and  $-0.01$ , respectively (Table 1). No adjustment of the float temperature or salinity data was performed.

Oxygen was derived from the optode sensor (Aanderaa 4330) which functions by emitting blue light on an oxygen-sensitive, permeable foil that is exposed to sea water and measuring the phase difference between incident and returned light (Kautsky, 1939). Sensor phase measurements were converted to dissolved oxygen concentration following the Argo procedure (Thierry et al., 2016, section 7.2.29) using seven manufacturer-provided calibration constants. Salinity compensation and pressure effects were corrected for following Bittig et al. (2015).

Oxygen data was also corrected for pre-deployment drift using in-air measurements from the floats while deployed. This is possible because the sensor is mounted on a 10 cm stalk on the top of the float (see figure 1) to record atmospheric oxygen while at the surface. The correction was made following Johnson et al. (2015) by comparing the float's in-air measurement



to atmospheric oxygen, which was calculated using NCEP reanalysis air pressure at 10 m above sea-level and the known molar fraction of oxygen in air, and determining a multiplicative factor to be applied to the sensor's oxygen measurements. Although the sensor may experience some drift over time after deployment (Bittig and Körtzinger, 2016; Johnson et al., 2017), negligible drift occurred in this case. Therefore, the mean gain for each float was applied to all oxygen data recorded by that float. A summary of gain values for each float is given in Table 2.

The optode's sensing foil is known to respond relatively slowly to changes in ambient oxygen because oxygen has to diffuse through the boundary layer that forms at the interface of water and foil and into the foil itself. The sensor's effective response time is thus a combination of the response times inherent to the sensor itself (related to the thickness of its sensing foil) and the boundary layer thickness adjacent to the foil. The inherent response time reported by the manufacturer for the Aanderaa optode used here is 25 s. The thickness of the boundary layer adjacent to the foil depends on the flow speed of seawater over the foil (and hence the vertical velocity of the float and ambient currents) and the molecular kinematic viscosity of water. The problem is not unique to oxygen sensors, but they have significantly longer response times than other sensors (such as CTDs, Bennett and Huaide, 1986).

Methods for correcting the hysteresis in oxygen measurements that results from the relatively slow response time have been established (Bittig et al., 2014; Bittig and Körtzinger, 2016; Bittig et al., 2018), but require knowledge of the sensor's effective response time, which is not typically known, and the time stamps of each oxygen measurement, which are not routinely transmitted. In section 3, we present a novel method for determining the time constant *in-situ*.

### 3 Response time correction method

#### 3.1 Mathematical formalism

An example of oxygen profiles from consecutive up- and downcasts (Figure 2a) illustrates the hysteresis pattern that is generally found in the oxycline. As a direct result of the slow response time of the oxygen sensor, the upcast has a memory of the low concentration in deeper waters and measures the gradient to be shallower than its true position, while the reverse is true for the downcast. The true oxygen profile must lie in between these two measured profiles. In order to derive a method for estimating the response time and performing a correction of the oxygen profiles, we first present a mathematical formalism describing the cause of the error.

Observation of an oxygen profile by the optode can be described as a low-pass filter of the true oxygen profile (Bittig et al., 2014), given by the following differential equation

$$h(t) = f(t) - \tau \frac{\partial h}{\partial t}, \quad (1)$$

where  $h(t)$  is the oxygen measured by the optode at time  $t$ ,  $f(t)$  is the true oxygen concentration (both in  $\text{mmol O}_2 \text{ m}^{-3}$ ), and  $\tau$  is the effective response time (s) which depends on the sensor and its environment. This differential equation can be solved

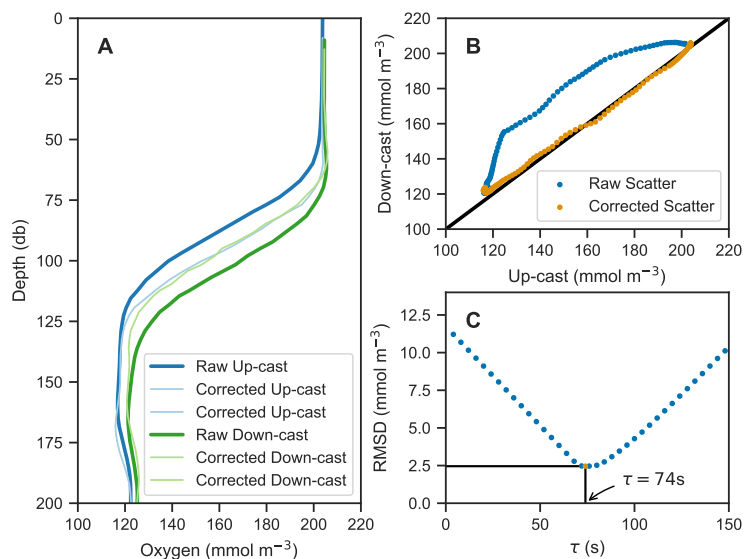

**Figure 2.** a) Example of raw oxygen measurements from up- and downcast (thick black and green lines, respectively) and corrected profiles (thin lines). b) Up- and downcasts (top 150 m) plotted against each other with raw data in blue and corrected data in orange. c) The Root-Mean-Square-Difference (RMSD) between the up- and downcasts after correcting casts for a range of time constants,  $\tau$ , showing the optimal  $\tau$  value in this case of 74 s in orange.

using a Laplace transform as follows (see appendix A1 for the full derivation)

$$h(t) = f(0)e^{-t/\tau} + \frac{1}{\tau} \int_0^t f(t-u)e^{-u/\tau} du. \quad (2)$$

The first term represents the decaying initial measurement by the sensor, where we have assumed that at time  $t = 0$  the sensor reads the true oxygen concentration correctly (i.e.  $h(0) = f(0)$ ). The second term is the convolution of the true oxygen concentration and a decaying exponential which represents the transfer function of the sensor (i.e. the delay in measuring the true concentration). Therefore, the observation  $h$  can be expressed more generally as a convolution  $h = f * g$  where  $h$  represents the measurement,  $f$  is the true concentration, and  $g$  is a function representing the response of the sensor (unitless). To recover the correct oxygen profile, the deconvolution of the profile and the sensor must be performed. This is possible if the observation  $h$  (with timestamps for each data point) and the equation describing the sensor transfer function  $g$  are known. From eq. 2, the sensor's transfer function can be defined as

$$g(t) = \frac{1}{\tau} e^{-t/\tau}. \quad (3)$$

This provides the mathematical basis for correcting the sensor hysteresis.

Up to now, the sensor theory has been discussed in continuous time. In order to apply a correction to the data, the formalism must be discretized. We are discretizing the equation in Laplace space and then transforming it into the more familiar time



domain. By taking the Laplace transform of the transfer function (eq. 3) and assigning the proper Laplace variable, then discretizing the Laplace transform using a bilinear transformation and performing the inverse discrete Laplace transform (or Z-transform, see Proakis and Monolakis, 1996; Antoniou, 2018), the following relationship can be derived

$$h_n = ah_{n-1} + b(f_n + f_{n-1}), n = 1, \dots, N \quad (4)$$

105 with the unitless coefficients

$$b = \left(1 + 2\frac{\tau}{t_n - t_{n-1}}\right)^{-1}, a = 1 - 2b.$$

See appendix A2 for the detailed derivation. Eq. 4 can be re-written in the same form as provided by Bittig and Körtzinger (2016), their eq. A3,

$$\frac{f_n + f_{n-1}}{2} = \frac{1}{2b}(h_n - ah_{n-1}) \quad (5)$$

and is a recursive formulation similar to the one used for correction of thermal mass in conductivity cells (Lueck, 1990; Lueck  
5 and Picklo, 1990). Since deconvolution is known to amplify random errors, which is especially relevant where the truth  $f(t)$  is convolved with the transfer function of an instrument  $g(t)$ , smoothing of the raw signal may improve the final estimate (Wiener, 1964).

Eq. 4 provides the recipe for correcting for the slow sensor response. Two essential ingredients for applying this correction, in addition to the raw measurements themselves, are knowledge of their time stamps and of the effective response time,  $\tau$ .

10 Next, an *in-situ* method for determining the measurement's effective response time is described.

### 3.2 *In-situ* determination of measurement response time

In-situ determination of the measurement's effective time constant is possible if consecutive up- and downcasts are recorded, assuming the oxygen profile does not significantly change between consecutive casts. In our case, the top 200 m were sampled on average within 70 min during continuous sampling and timestamps were transmitted. Determination of the time constant  
15 can be thought of as an inverse problem where the correction method derived in section 3.1 is applied to a range of plausible time constants. The one that minimizes the discrepancy between consecutive up- and downcasts is the optimal value and taken as the effective time constant.

Here, we applied the correction method from eq. (5) while systematically sweeping over the range of response times from 0 to 150 s on 0.5 s increments. The root-mean-square-difference (RMSD) between up- and downcasts was calculated for each  
20 response time and the one with the minimum RMSD taken as the effective time constant for that pair of profiles. An illustration of the process is in Figure 2c. The effect of the correction is visible in panels 2a and 2b.

Since the deconvolution is known to amplify high-frequency noise, the profiles were smoothed using a 7-pt moving mean prior to performing the correction. This was particularly important for the downcasts. Profiling floats typically only measure on the upcast because most of the sensors are located near or at the top of the float allowing the sensors to measure undisturbed  
25 water on the upcasts. On the downcasts, water is thought to have been churned up by the body of the float increasing random





**Table 2.** Mean gain values derived from in-air measurements,  $G$ , and median time constants,  $m_\tau$ , for each float with standard deviations ( $\sigma$ ).  $G$  and  $\sigma_G$  are unitless.

| Float | $G$  | $\sigma_G$ | $m_\tau$ (s) | $\sigma_\tau$ (s) |
|-------|------|------------|--------------|-------------------|
| f7939 | 1.17 | 0.18       | 76.5         | 8.5               |
| f7940 | 1.03 | 0.12       | 69           | 15.5              |
| f7941 | 1.14 | 0.17       | 67           | 16.9              |
| f7942 | 1.17 | 0.24       | 64.5         | 14.9              |
| f7943 | 1.15 | 0.19       | 75           | 16.5              |
| f7944 | 1.15 | 0.12       | 76           | 13.9              |
| f7945 | 1.16 | 0.14       | 73.5         | 13.3              |
| f8081 | 1.18 | 0.20       | 68           | 16.0              |
| f8082 | 1.15 | 0.09       | 73           | 18.8              |
| f8083 | 1.12 | 0.18       | 66.5         | 20.4              |

errors. In our case, smoothed profiles agreed more closely in the oxygen gradient, and their RMSD after correction was slightly reduced.

The calculations were done for each pair of consecutive up- and downcasts and down- and upcasts, resulting in a population of  $N - 1$  effective time constants for each set of  $N$  float profiles. The median time constants for each float are listed in Table 2. Median optimal time constants ranged from 64.5-76.5 s across the 10 floats, and the standard deviation of those values was as low as 8.5 s and as high as 20.4 s. Similar to the gain correction (see section 2.2), the median optimal response time of each float was applied to all profiles from that float.

The variation of effective response time from profile to profile for one float is due to its dependence on various factors, chiefly among them is the flow speed of ambient water over the sensor. Next, we analyze how deviations from the average profiling speed and random errors manifest themselves in the final corrected oxygen product.

### 3.3 Propagation of response-time error and sensor noise

The optode measurements are subject to systematic and random errors. The effective response time may change with variations in temperature, salinity, pressure, and most importantly flow speed of ambient water at the sensing interface. The latter is highly dependent on profiling velocity which varied from 1.4 to 26.5 cm s<sup>-1</sup> with a mean of 12.2 cm s<sup>-1</sup> for our floats. To analyze how such variations in response time as well as random measurement errors propagate through the correction process, an idealized oxygen profile was sampled as it would be by a float and different known errors applied.

The response time effect is simulated by applying a discretized version of equation (eq. 1)

$$h_n = \alpha f_n + (1 - \alpha)h_{n-1} \text{ where } \alpha = \frac{\Delta t}{\tau + \Delta t} \quad (6)$$

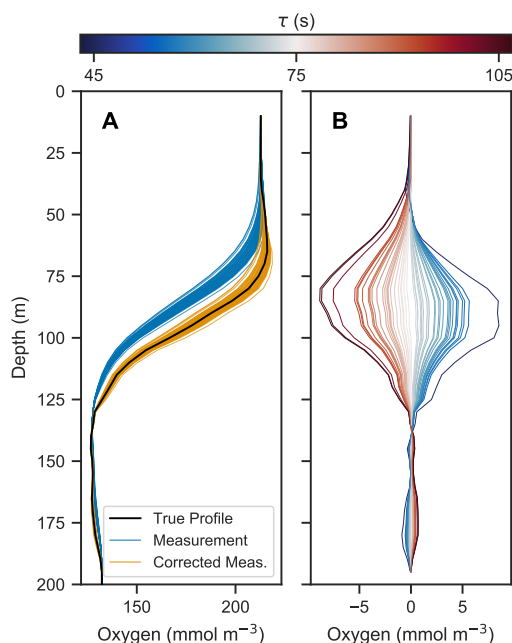

**Figure 3.** a) Simulated profile measurements (blue) of the true oxygen profile (black) for 50 different response times drawn randomly from a normal distribution with standard deviation of 15 s and mean of 75 s, and corrected measurements using a response time of 75 s (orange). b) Deviations corrected and true profiles.

where  $h_n$  and  $f_n$  are the the measurement and true oxygen concentration at timestep  $n$ , respectively. At  $t = 0$  we assumed  
45 oxygen is correctly measured, i.e.  $h(0) = f(0)$ . The right-hand-side term with  $f_n$  represents the real-time contribution to the  
measurement and the term with  $h_{n-1}$  represents the sensor's memory of previous measurements. The recursive structure of  
the measurement filter results in an exponentially weighted moving average with an infinite averaging window in time. A full  
derivation is given in appendix B.

We simulated the generation of optode measurements by prescribing a profiling velocity of  $15 \text{ cm s}^{-1}$ , taking a measurement  
50 every 5 m (roughly the vertical resolution of the floats), assigning a timestamp to each oxygen datum, and then running the  
model output through the measurement filter using a prescribed response time. Known errors were added to this measurement  
process as random perturbations of the response time and as random noise added to the measured oxygen values. The two  
error sources were examined individually for a range of standard deviations to systematically analyze the effect of each error  
type. Response times  $\tau$  (s) were chosen from a normal distribution with a mean of 75 s and standard deviations ranging from  
55 0 to 15 s. Sensor noise errors  $\epsilon$  ( $\text{mmol m}^{-3}$ ) were chosen from a normal distribution with mean zero and standard deviations  
ranging from 0 to 1.5 ( $\text{mmol m}^{-3}$ ). Following the simulated measurement, the measured profiles underwent the same correction  
process as the float data: first a 7-pt smoothing and then the response time correction using the expected value of 75 s. Different  
magnitudes of errors were tested and for each trial the measurement and correction process was repeated 50 times.

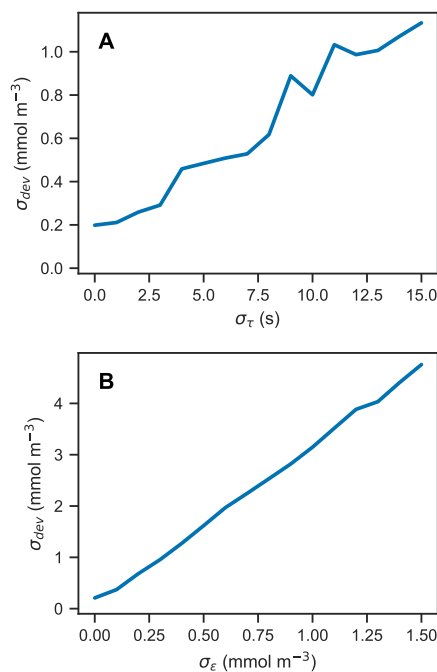

**Figure 4.** Standard deviation of the error profiles for increasingly wide distributions of a) response time and b) random error. For random errors,  $\sigma_{dev}$  increases linearly with  $\sigma_\epsilon$ , with a slope of 3.09 (unitless).

Figure 3 shows the measured and corrected profiles for the widest distribution of response time errors tested ( $\sigma_\tau = 15$  s), in the absence of random sensor error. In gradient-free segments of the oxygen profile, the error has little to no effect, while larger deviations from the true profile occur in the high-gradient segments of the profile, with a maximum deviation of almost 10  $\text{mmol m}^{-3}$ . In contrast to the response time error, random sensor error does not have a localized effect on the profile, but the errors appear to be amplified by the correction process. Figure 4 summarizes the two error analyses by showing the standard deviation of the deviation profiles,  $\sigma_{dev}$ , for increasingly wide distributions of response time and random errors. For response time errors, the distribution of deviations has a maximum value exceeding 1.0  $\text{mmol m}^{-3}$ . This demonstrates that, despite relatively large ranges of response times estimated for the floats, the corrected profiles are close to the true oxygen profile. For random noise, an amplification of the errors by a factor of 3 occurs through the correction process. This amplification is consistent with theoretical consideration (see appendix C).

### 3.4 Discussion

The slow response time of the optode is considered a prominent source of error when measuring oxygen on floats (see Plant et al., 2016; Johnson et al., 2017) but is often not rigorously corrected for. One reason is that the timestamps of the oxygen measurements are not typically transmitted (Johnson et al., 2017). Another reason is that the effective sensor response time is



5 difficult to characterize without knowledge of the true profile. To minimize response time errors, some optodes are pumped to significantly increase the flow speed at the interface between sensing foil and ambient seawater and thus decrease boundary layer thickness and the effective response time. However, even pumped optodes have a characteristic response time, albeit reduced. In addition, pumped optodes have the disadvantages of consuming more energy and being unable to record in-air measurements for calibration.

10 Plant et al. (2016) cited response time errors as the cause of unrealistically large values of positive NCP just above the mixed layer and negative NCP below. They chose to correct mixed layer oxygen by extending surface oxygen values on the assumption that oxygen is completely uniform in the mixed layer. However, a full correction using the filtering solution provided by Bittig et al. (2014) could have improved the estimates not only at the mixed layer interface but also for the entire profile. While oxygen values near the base of the mixed layer were the most obvious evidence of errors induced by the response time, any  
15 oxygen gradient would have been subject to the effects of sensor response time as well and thus would have been improved by the inverse filtering correction.

Johnson et al. (2017) compared oxygen measurements made by floats in the Southern Ocean and Winkler titrations (Winkler, 1888; Carpenter, 1965) from bottle samples at deployment stations. While optode-measured oxygen generally agreed very well with the Winkler measurements, the majority of error was concentrated around high-gradient areas. Response time corrections  
20 could not be performed in this case because the floats did not transmit time stamps for each oxygen measurements and only the upcasts were transmitted. As previously stated, time stamps and knowledge of the measurement's effective time constant are the two key pieces of information required to make the correction. Measurement of consecutive up- and downcasts allows for an *in-situ* determination of the effective response time as shown here.

The effective response times derived here are much longer than the sensor-inherent response times reported on the Aanderaa  
25 data sheet, but this discrepancy is not surprising. The data sheet provides an estimate of the inherent sensor response time (25 s for 63% of the signal), which is calculated by subjecting the sensor to a sudden step change in oxygen (by plunging from air into water). Here we have determined the effective response time of the measurement *in-situ*, which also accounts for diffusion through the boundary layer at the sensing interface. This boundary-layer effect is significant for typical float velocities. The 70 s response times found here are fully consistent with previously reported response times of 15-45 s for CTD measurements  
30 (Bittig et al., 2014) and 70-140 s for profiling floats (Bittig and Körtzinger, 2016; Bittig et al., 2018) based on theoretical considerations of flow-dependent boundary layer thickness.

Subjecting simulated measurements to varying effective response times and random sensor errors showed that the combined effects of these two sources of error can cause significant deviations between the corrected and true profiles (Figure 3). The 50 repeated measurements of the oxygen profile with a response time error (standard deviation) of 10 s and random errors on  
35 the order of  $1.0 \text{ mmol m}^{-3}$  resulted in deviations of approximately  $1.0 \text{ mmol m}^{-3}$  and  $3.0 \text{ mmol m}^{-3}$  respectively (Figure 4). Taking these two sources of error and considering them independent from one another, the combined error estimate is between  $3\text{-}4 \text{ mmol m}^{-3}$ , which is significant considering that the precision needed to detect diurnal cycles in oxygen.

Bittig et al. (2018) stated that the relation between the boundary layer thickness and float profiling velocity must be established on a case-by-case basis depending on the platform characteristics and optode attachment with respect to flow direction.



40 For this analysis, effective time response of the optode on the up- and downcasts are treated to be equal. In reality, flow around the optode may not be identical for the two cast directions; however, the impact of this difference on the corrections is likely small.

The technique we propose for determining the effective time constant is a simple and practical method for *in-situ* application and more straightforward than characterizing flow surrounding the optode. It can easily be performed by any end-user of optode data from floats, as long as time stamps and occasional up- and downcasts are transmitted. In our case, the difference between the measured and corrected profiles is substantial. In the study region, where the maximum oxygen gradient of each profile averaged  $2.55 \text{ mmol m}^{-3} \text{ db}^{-1}$ , median differences between observed and corrected profiles ranged from 36-39  $\text{mmol m}^{-3}$  at the maximum gradient.

The key assumption made in our method for *in-situ* response time determination is that the up- and downcasts should match. We performed this comparison in pressure space. Conducting the analysis in density space instead would be a natural extension and may avoid potential errors resulting from isopycnal movements. A potential limitation of the method is that the float measures disturbed water during the downcast, as the optode sits at the top of the float. Such a change in the flow field at the sensor interface may affect the response time during downcasts. It seems unlikely that this has a large effect on our results, but the response times for up- and downcasts are probably not exactly the same.

## 55 4 Biological & physical drivers of dissolved oxygen variations

### 4.1 Measurement of diurnal oxygen cycles

Next, we attempt to estimate GPP, R, and NCP from hysteresis-corrected oxygen measurements collected during continuous mode profiling. The approach relies on an ability to determine diurnal variations in oxygen in the euphotic zone and the following assumptions. During daylight hours, oxygen increases at a rate proportional to the difference between GPP and R, while during the night oxygen decreases at the rate R. Then, GPP can be estimated from diurnal oxygen cycles of this idealized structure. This is essentially what Briggs et al. (2018) assumed when they applied a linear fit to their nighttime data, where the slope represents the respiration rate, and extrapolated forward to noon the next day to project the dissolved oxygen concentration in the absence of any production (Figure 5, dashed lines). An estimate for morning GPP was then obtained with the help of a second linear fit applied to the daytime data where the difference between the extrapolated nighttime fit and the value of the daytime fit at noon represents oxygen production in the morning (Figure 5, light green bars). The oxygen produced in the second half of the day can be calculated in a similar manner (Figure 5, dark green bars).

An observed time series of mean euphotic zone oxygen from a continuous mode sampling period is shown as example in Figure 6. While oxygen is often changing periodically with increases during the day and decreases during the night, there also are several instances when oxygen changes cannot be reconciled with the expected day-night pattern of a biologically driven cycle. Light and dark red bars represent unrealistic negative gross production values (GPP, by definition, must be positive). This time series illustrates that in the study region, estimating production from diurnal oxygen changes is not straightforward. It appears that processes other than biological production and consumption are affecting oxygen, complicating the expected

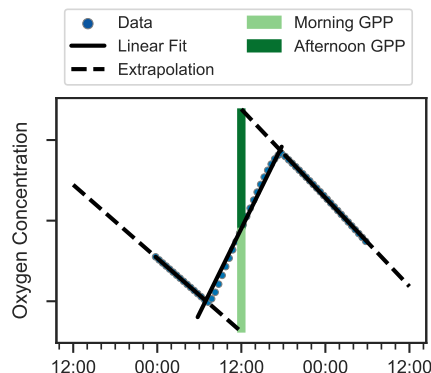

**Figure 5.** Schematic showing method for calculating GPP and R using oxygen data (points) after Briggs et al. (2018). Respiration rates are determined as nighttime slopes (solid black lines), which are then projected forward and backward in time (dashed black lines). The differences between these projections and oxygen at noon observed yields the morning and afternoon GPP (light and dark green bars respectively).

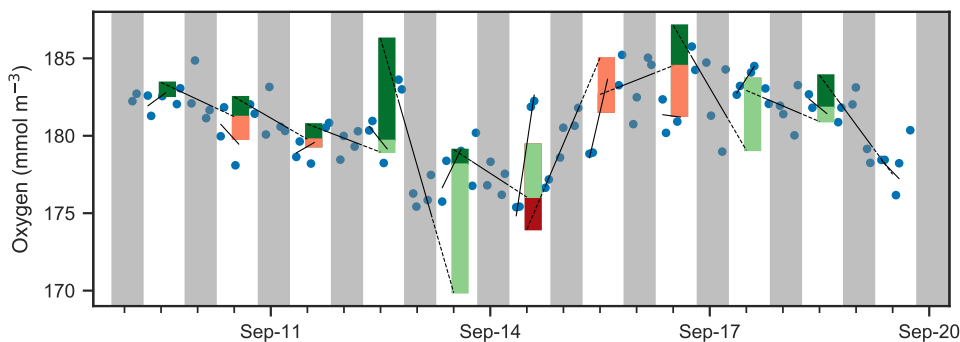

**Figure 6.** Mean oxygen in the euphotic zone for continuous mode measurements in September from float f8081, with attempts to estimate GPP. Legend is the same as figure Figure 5, but orange and red bars indicate when the method obviously fails because other processes than production and respiration are driving changes in oxygen. Grey shaded sections show local nighttime.

signal. We obtained similar results during other periods and for other floats. A confounding physical driver of short-term oxygen variations is explored in section 4.2.

#### 4.2 Physically induced variations in dissolved oxygen

- 5 Vertical oscillations of isopycnals may occur in ocean environments due to several processes including internal or near-inertial waves, barotropic or baroclinic tides, and mesoscale eddies, and may influence dissolved oxygen dynamics in the euphotic zone. Such isopycnal displacements will push the oxygen gradient up and down creating a periodic signal in vertically integrated oxygen. Although a spectrum of internal motions are present (Garrett and Munk, 1972, 1979), in this section we examine an example that likely represents a near-inertial wave as the observed oscillations have a period of 24 hr, corresponding

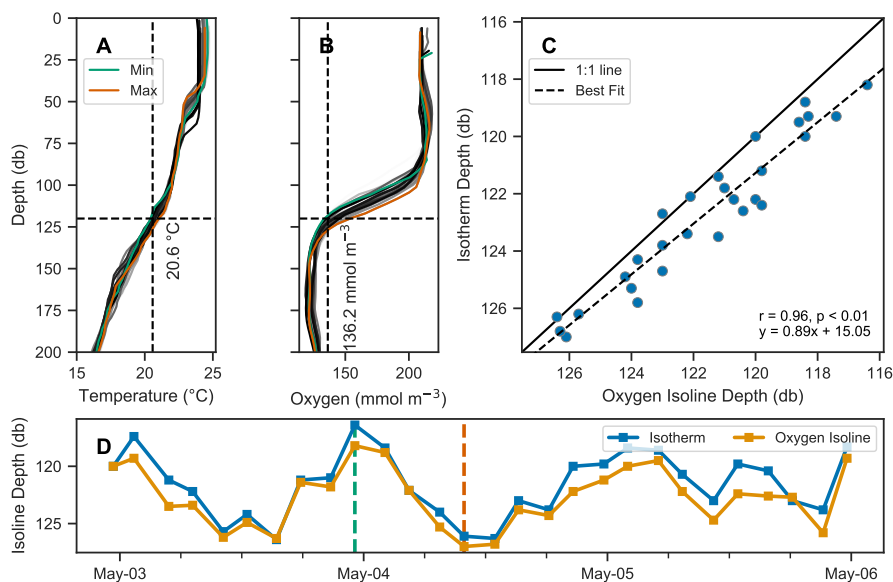

**Figure 7.** Co-variation of isotherm and iso-concentration depths. a-b) Profiles of temperature and dissolved oxygen, where the profiles with the minimum and maximum depths of the  $20.6^{\circ}\text{C}$  isotherm and  $136.2\text{ mmol O}_2\text{ m}^{-3}$  iso-concentration are shown in green and orange respectively, and all other profiles are shown on a grey color scale indicative of time with lighter shades indicating older and darker shades more recent measurements. c-d) Depths of the isotherm and iso-concentration plotted against each other in c) and as a timeseries in d) , showing their co-variation.

10 to the Coriolis frequency at  $30^{\circ}\text{N}$  (Alford et al., 2016). Caution must be exercised as to not misconstrue the physical oscillatory signal with a biological one.

Vertical oscillations were visible in our float data in many instances. As an example, a 3-day period immediately following the deployment of float f7940 on May 2, 2017 is examined here. This float was deployed shortly before passage of an atmospheric front with elevated wind speeds up to about  $35\text{ km hr}^{-1}$ . Vertical oscillations are apparent by coincident up and down movements of the oxygen gradient moving in concert with isopycnals (Figure 7). A tight correlation of oxygen isolines and isopycnal (or isotherm) depths identify when physical oscillations are driving changes in oxygen.

15 The depths of the  $20.6^{\circ}\text{C}$  isotherm and  $136.2\text{ mmol O}_2\text{ m}^{-3}$  iso-concentration are highly correlated over this time period (Figure 7c,  $r = 0.96$ ,  $p < 0.01$ ). The time series of these depths are also highly correlated with the time series of integrated oxygen (Figure 8,  $r = 0.83$ ,  $p < 0.01$ ). The extrema are aligned as well, as the maximum depths of the isotherm correspond with the maximum values of integrated oxygen, and similarly minimal depths correspond to integrated oxygen minima, occurring  
20 near noon and at midnight, respectively.

Since the vertical movement of isopycnals and oxygen isolines creates a tight correlation between the two, it should be possible to remove the variability due to vertical motions by analyzing changes in oxygen in density space rather than pressure space. This is done by calculating the anomaly (by subtracting an average profile over a time period from each constituent

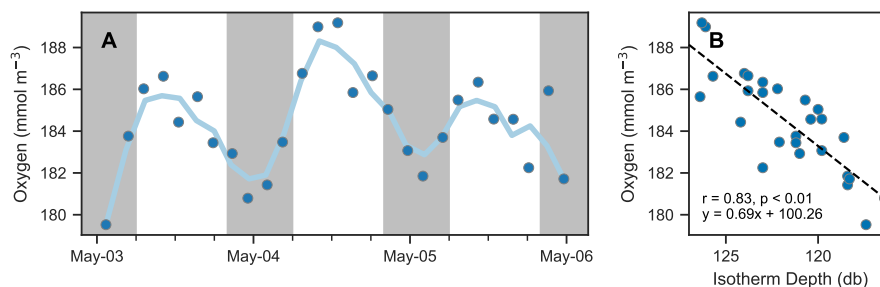

**Figure 8.** Isotherm depth and mean oxygen comparison. a) Timeseries of mean oxygen between 25-150 db. A period of about 24 hr is observed, however it is not in phase with the day/night cycle (nighttime indicated by shaded areas) as would be expected for a biological signal. b) Scatter of mean oxygen concentration against isotherm depth (see Figure 7d).

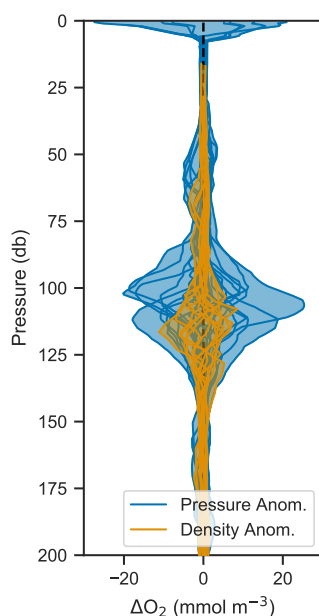

**Figure 9.** Anomalies of oxygen profiles from Figure 7b shown in pressure (blue) and density (orange) space.

25 profile) at each density level, and then mapping that anomaly back to pressure space. Figure 9 shows the anomalies calculated  
in pressure and density space compared to each other, and anomalies calculated in density space are significantly smaller,  
indicating that most of the variability in oxygen can be accounted for by corresponding changes in density. This technique  
offers a path to removing the oscillatory signal, and therefore isolating underlying signals such as biological production. In this  
case, however, the remaining anomaly is on the order of expected errors based on the analysis performed in Section 3.3, and so  
30 a biological signal cannot be discerned in light of the accumulated error.





### 4.3 Discussion

The data and analysis presented in this section show that diurnal changes in oxygen can be measured with a profiling float; however, the changes observed here could not unequivocally be linked to biological production and respiration. This made estimates of daily GPP, R, and NCP based on these observations unreliable or impossible. Compared to previous work by  
35 Briggs et al. (2018), which focused on diurnal oxygen cycles in the North Atlantic spring bloom, the Gulf of Mexico has relatively low production. Nicholson et al. (2015) studied diurnal oxygen cycles in a similarly low-productivity region in the subtropical North Pacific, but accumulated and averaged many days in order to derive an estimate of production.

The location of the floats and the timing of the continuous mode observations also contributed to the difficulty in estimating production. Continuous mode was turned on when strong storms were passing through the Gulf likely causing physical drivers  
40 to dominate variations in oxygen. Additionally, the floats were deployed near the shelf break and topography is a known factor contributing to the formation of internal motions (Alford et al., 2016) under external physical forcings. Furthermore, the temporal resolution was on the low end for making diurnal measurements. In continuous mode, the floats still recorded full profiles to at least 1000 m because of other research objectives. In a study more directly focused on diurnal oxygen cycles, profiling to only 200 to 300 m would significantly increase the temporal resolution of the oxygen time series, while still  
45 capturing the entire euphotic zone.

Vertical oscillations, and other physical drivers, can influence euphotic-zone oxygen with implications for the measurement of biologically driven changes. In attempting to measure biological productivity using oxygen, it is important to understand such effects, and take them into consideration. Vertical oscillations can be identified in float data by observing the synchronous movement of physical and biochemical variables in the water column. When identified, the characteristically tight correlation  
50 of density and oxygen may still allow for the isolation of the underlying biological signal. In our case, although the vertical oscillation signal can mostly be captured by variations in density (Figure 9), the remaining signal cannot always be attributed to biological changes in the water column. For our data, this analysis showed anomalies on the same scale as the expected error from the oxygen optode. In Plant et al. (2016), evidence of internal waves was also present in the data, and a similar method was used to remove this signal. In their case, using density to map the observations to a physical model that did not include vertical oscillations, it was possible to isolate the biological signal.

Elevated winds acting on this region with variable topography can generate internal oscillations with a period of about  
5 24 hr (determined by the Coriolis frequency at 30°N, where the autonomous floats in this study were deployed). Without consideration of the physical data, if this oscillation was aligned with the expected day-night cycle, it could falsely appear to be driven by biological productivity. The diurnal-scale period of the internal oscillations could also be problematic if production is estimated by accumulating and averaging data as in Nicholson et al. (2015). That study quantified average NCP over 110 days by accumulating multiple glider measurements of oxygen into one 24-hr cycle. Only oxygen data that fit the theoretical  
10 biological curve defined *a priori* to a satisfactory degree ( $p < 0.05$ ) were accumulated (73 of 110 days satisfied this condition). This approach could allow physically driven oscillations that are aligned with the day-night cycle to be attributed to biology.



## 5 Conclusions and recommendations

In the Introduction, we posed two sets of questions relevant for the estimating of NPP and R from the diurnal oxygen cycle measured by continuously profiling autonomous floats. The first set addressed the technical question whether the sensor and platform can take sufficiently frequent and accurate measurements. The second set contained oceanographic questions about what primary physical or biological processes drive changes in dissolved oxygen, and how they manifest themselves in the data. Addressing the first led to the development of a novel method for determining the effective *in situ* time constant of an oxygen optode deployed on a profiling float, without needing to characterize the physical flow around that sensor. The second was addressed by analyzing physical and oxygen measurements from our study in the Gulf of Mexico and provides context and techniques to future studies seeking to quantify production using profiling floats.

Oxygen optodes are challenged to make accurate measurements in gradients because of their slow response time. However, the resulting errors can be corrected if timestamps of the measurements and the effective response time are known. We developed an optimization procedure to determine the effective time constant *in situ* by using both the up- and downcasts measured by the floats. The effective time constant determined in the field represents the combination of the inherent sensor response time and the response time that results from boundary layer effects. The time constants derived by this method are similar to estimates provided in the previous literature. While the oxygen measurements were improved significantly by the correction procedure, remaining errors, especially near gradients, may prohibit reliable production estimates in low-productivity environments or where physical processes have large effects on the oxygen signal.

Given the small productivity of the Gulf of Mexico, oxygen optodes on autonomous floats were not able to provide sufficient precision to estimate production on a diurnal scale, likely because of a combination of sensor error and non-biological changes in oxygen. For processes like the vertical oscillation of isopycnals, analysis in density space can reveal underlying signals, and inspection of anomalies may be useful in calculating diurnal scale biological changes in oxygen.

The need for highly accurate oxygen measurements when estimating production from autonomous platforms leads to the following recommendations for future deployments of autonomous floats with oxygen optodes:

- Include timestamps for every oxygen measurement on float data transmission. The corrections discussed and applied here must be performed on oxygen as a time series. Correction for sensor response time is impossible without this information.
- Program the float mission to include a calibration period upon float deployment where both up- and downcasts are recorded. This will provide a very practical and robust method to calculate the effective *in-situ* response times.

This work contributes to improved quality control of oxygen measurements by optodes, may stimulate further use of profiling floats for observing diurnal cycles of dissolved oxygen for calculation of GPP and R, and enhances our understanding of processes driving changes in oxygen in the shelf break region in the northern Gulf of Mexico. Our methods and findings are applicable to other regions.



*Code availability.* MATLAB code for determining sensor response time: <https://github.com/MEMG/optode-response-time>

45 *Data availability.* Float data set: <https://data.gulfresearchinitiative.org/pelagos-symfony/data/R5.x275.000%3A0004>.

## Appendix A: Optode mathematical formalism

### A1 Laplace solution

Recall filter differential equation

$$h(t) = f(t) - \tau \frac{\partial h}{\partial t}. \quad (\text{A1})$$

50 This can be re-written as an initial value problem assuming that the first measurement has the correct value ( $h(0) = f(0)$ )

$$h' + \frac{1}{\tau}h = \frac{1}{\tau}f. \quad (\text{A2})$$

Taking the Laplace transform of the above equation, we obtain

$$\mathcal{L}\{h' + \frac{1}{\tau}h\} = \mathcal{L}\{\frac{1}{\tau}f\} \quad (\text{A3})$$

$$sH(s) - h(0) + \frac{1}{\tau}H(s) = \frac{1}{\tau}F(s). \quad (\text{A4})$$

55 Re-arranging to solve for  $H(s)$  and substituting  $h(0) = f(0)$  yields

$$H(s) = \left(\frac{1}{s + \frac{1}{\tau}}\right)f(0) + \frac{1}{\tau} \left(\frac{1}{s + \frac{1}{\tau}}\right)F(s). \quad (\text{A5})$$

For the first term, we can take the inverse Laplace transform directly, as we recognize the following form

$$\mathcal{L}\{e^{\alpha t}\} = \frac{1}{s - \alpha}. \quad (\text{A6})$$

For the second term, because  $f(t)$  is unknown, the solution is written as a convolution. The final solution is

$$60 \quad h(t) = f(0)e^{-t/\tau} + \frac{1}{\tau} \int_0^t f(t-u)e^{-u/\tau} du. \quad (\text{A7})$$

### A2 Discretized solution

The transfer function of the oxygen optode is expressed as

$$g(t) = \frac{1}{\tau}e^{-t/\tau}, \quad (\text{A8})$$

and the Laplace transform of this expression is

$$65 \quad G(s) = \mathcal{L}\{g(t)\} = (1 + s\tau)^{-1}. \quad (\text{A9})$$

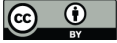

In order to convert this continuous-time domain (analog) filter to a discrete-time domain (digital) filter, we apply a bilinear transform. The bilinear transform is a first order approximation of making the change of variables  $z = e^{s\Delta t}$  (or  $s = \frac{1}{\Delta t} \ln(z)$ ), where  $\Delta t$  is the time between measurements. This approximation is made by taking the first term in the Taylor series of the change of variables

$$70 \quad s = \frac{2}{\Delta t} \frac{1 - z^{-1}}{1 + z^{-1}}. \quad (\text{A10})$$

Substituting the above into eq. A9 yields

$$G(z) = G(s) \Big|_{s = \frac{2}{\Delta t} \frac{1 - z^{-1}}{1 + z^{-1}}} \quad (\text{A11})$$

$$= \left( 1 + \frac{2\tau}{\Delta t} \frac{1 - z^{-1}}{1 + z^{-1}} \right)^{-1}, \quad (\text{A12})$$

which can be re-arranged to

$$75 \quad G(z) = \frac{(1 + 2\tau/\Delta t)^{-1}(1 + z^{-1})}{1 + \frac{1 - 2\tau/\Delta t}{1 + 2\tau/\Delta t} z^{-1}}. \quad (\text{A13})$$

Finally, substituting in  $b = (1 + 2\tau/\Delta t)$  and  $a = 1 - 2b$  yields

$$G(z) = \frac{b(1 + z^{-1})}{1 - az^{-1}}. \quad (\text{A14})$$

The inverse Z-transform (i.e. discrete inverse Laplace transform) of eq. A14 yields eq. 4.

## Appendix B: Discretized optode filter

80 Recall filter differential equation

$$h(t) = f(t) - \tau \frac{\partial h}{\partial t}. \quad (\text{B1})$$

Discretizing the above equation using finite difference

$$h_n = f_n - \tau \frac{h_n - h_{n-1}}{\Delta t}, \quad (\text{B2})$$

then re-arranging and factoring out  $h_n$ , yields

$$85 \quad h_n(1 + \tau\Delta t) = f_n + \frac{\tau}{\Delta t} h_{n-1}. \quad (\text{B3})$$

The solution

$$h_n = \left( \frac{\Delta t}{\tau + \Delta t} \right) f_n + \left( \frac{\tau}{\tau + \Delta t} \right) h_{n-1} \quad (\text{B4})$$

can be derived with some simple algebra. Defining  $\alpha = \frac{\Delta t}{\tau + \Delta t}$  yields

$$h_n = \left( \frac{\Delta t}{\tau + \Delta t} \right) f_n + \left( \frac{\tau + \Delta t}{\tau + \Delta t} - \frac{\Delta t}{\tau + \Delta t} \right) h_{n-1} \quad (\text{B5})$$

$$h_n = \alpha f_n + (1 - \alpha) h_{n-1}. \quad (\text{B6})$$



## Appendix C: Error propagation

Adding error into the inverse filtering solution (eq. 5) as an addition to the observations yields

$$\frac{f_n + f_{n-1}}{2} = \frac{1}{2b}(h_n - ah_{n-1}) + \frac{1}{2b}(\epsilon_n - a\epsilon_{n-1}) \quad (\text{C1})$$

- 5 where  $\epsilon_n$  is the error at timestep  $n$ . Our goal is to obtain the coefficient in front of the error term. Assuming that the error  $\epsilon$  is *i.i.d.*, the variance of this additional term is as follows

$$\sigma_f^2 = \frac{1 + a^2}{4b^2} \sigma_\epsilon^2. \quad (\text{C2})$$

Replacing  $a = 1 - 2b$  and re-arranging yields

$$\frac{1 - a^2}{4b^2} = \frac{1}{2}b^{-2} - b^{-1} + 1. \quad (\text{C3})$$

- 10 Replacing  $b^{-1} = 1 + 2\frac{\tau}{\Delta t}$ , and simplifying we obtain

$$\frac{1}{2}b^{-2} - b^{-1} + 1 = \frac{1}{2}\left(1 + 4\frac{\tau^2}{\Delta t^2}\right). \quad (\text{C4})$$

The variance of the error will be multiplied by the above factor. The standard deviation therefore is amplified by its square root

$$\frac{\sigma_f}{\sigma_\epsilon} = \sqrt{\frac{1}{2}\left(1 + 4\frac{\tau^2}{\Delta t^2}\right)}. \quad (\text{C5})$$

The above gives the general result. For our error analysis,  $\tau = 75$  s and  $\Delta t = 33$  s, we obtain an amplification of

$$15 \sqrt{\frac{1}{2}\left(1 + 4\frac{\tau^2}{\Delta t^2}\right)} = \sqrt{\frac{1}{2}\left(1 + 4\frac{(75)^2}{(33)^2}\right)} \quad (\text{C6})$$

$$\approx 3.3. \quad (\text{C7})$$

The above does not account for any smoothing, and is consistent with our numerical results.

- Author contributions.* CG and KF formulated the idea and research questions underlying this study and co-wrote the manuscript. CG carried out processing and quality control of the oxygen data, developed the correction method, and carried out all analyses. LKS and JB prepared the cruise, deployed the float with assistance by CG and KF, and oversaw data transmission. CR made essential contributions to the error analysis in section 3.3.

*Competing interests.* The authors have no competing interests.

*Acknowledgements.* This work was supported by the Gulf of Mexico Research Initiative grant GoMRI-V-487.



## References

- 25 Alford, M. H., MacKinnon, J. A., Simmons, H. L., and Nash, J. D.: Near-Inertial Internal Gravity Waves in the Ocean, *Annual Review of Marine Science*, 8, 95–123, 2016.
- Antoniou, A.: *Digital filters: analysis, design, and signal processing applications*, 2 edn., 2018.
- Bennett, A. S. and Huaide, T.: CTD time-constant correction, *Deep Sea Research Part A. Oceanographic Research Papers*, 33, 1425–1438, 1986.
- 30 Bittig, H. C. and Körtzinger, A.: Technical Note: Oxygen Optodes on Profiling Platforms: Update on Response Times, In-Air Measurements, and In-Situ Drift, *Ocean Science Discussions*, 2016.
- Bittig, H. C., Fiedler, B., Scholz, R., Krahnemann, G., and Körtzinger, A.: Time response of oxygen optodes on profiling platforms and its dependence on flow speed and temperature, *Limnol. Oceanogr.*, 12, 617–636, 2014.
- Bittig, H. C., Fiedler, B., Fietzek, P., and Körtzinger, A.: Pressure Response of Aanderaa and Sea-Bird Oxygen Optodes, *Journal of Atmospheric and Oceanic Technology*, 32, 2305–2317, 2015.
- 35 Bittig, H. C., Körtzinger, A., Neill, C., van Ooijen, E., Plant, J. N., Hahn, J., Johnson, K. S., Yang, B., and Emerson, S. R.: Oxygen Optode Sensors: Principle, Characterization, Calibration, and Application in the Ocean, *Frontiers in Marine Science*, 4, 1–25, 2018.
- Briggs, N., Guðmundsson, K., Cetinić, I., D’Asaro, E., Rehm, E., Lee, C., and Perry, M. J.: A multi-method autonomous assessment of primary productivity and export efficiency in the springtime North Atlantic, *Biogeosciences*, 15, 4515–4532, 2018.
- 40 Bushinsky, S. M., Emerson, S. R., Riser, S. C., and Swift, D. D.: Accurate oxygen measurements on modified Argo floats using in situ air calibrations, *Limnology and Oceanography: Methods*, 14, 491–505, 2016.
- Caffrey, J. M.: Production, respiration and net ecosystem metabolism in U.S. estuaries., *Environmental Monitoring and Assessment*, 81, 207–219, 2003.
- Carpenter, J. H.: The Chesapeake Bay Institute Technique for the Winkler Dissolved Oxygen Method, *Limnology and Oceanography*, 10, 141–143, 1965.
- 45 Cassar, N., Barnett, B. A., Bender, M. L., Kaiser, J., Hamme, R. C., and Tilbrook, B.: Continuous High-Frequency Dissolved O<sub>2</sub>/Ar Measurements by Equilibrator Inlet Mass Spectrometry, *Analytical Chemistry*, 81, 1855–1864, 2009.
- Claustre, H., Morel, A., Babin, M., Cailliau, C., Marie, D., Marty, J.-C., Tailliez, D., and Vaultot, D.: Variability in particle attenuation and chlorophyll fluorescence in the tropical Pacific: Scales, patterns, and biogeochemical implications, *Journal of Geophysical Research: Oceans*, 1999.
- 50 Cullen, J. J., Neale, P. J., and Science, M. P.: Biological weighting function for the inhibition of phytoplankton photosynthesis by ultraviolet radiation, *Science*, 258, 646–650, 1992.
- Dall’Olmo, G., Boss, E., Behrenfeld, M. J., and 2011: Inferring phytoplankton carbon and eco-physiological rates from diel cycles of spectral particulate beam-attenuation coefficient, *Biogeosciences*, 2011.
- 5 Garrett, C. and Munk, W.: Space-Time scales of internal waves, *Geophysical Fluid Dynamics*, 3, 225–264, 1972.
- Garrett, C. and Munk, W.: Internal waves in the ocean, *Annual Review of Fluid Mechanics*, 1979.
- Gernez, P., Antoine, D., and Huot, Y.: Diel cycles of the particulate beam attenuation coefficient under varying trophic conditions in the northwestern Mediterranean Sea: Observations and modeling, *Limnol. Oceanogr.*, 56, 17–36, 2010.



- Gruber, N., Doney, S. C., Emerson, S. R., Gilbert, D., Kobayashi, T., and Körtzinger, A.: Adding Oxygen to Argo: Developing a Global In Situ  
10 Observatory for Ocean Deoxygenation and Biogeochemistry., *Proceedings of OceanObs Sustained Ocean Observations and Information for Society*, 2010.
- Hamme, R. C., Cassar, N., Lance, V. P., Vaillancourt, R. D., Bender, M. L., Strutton, P. G., Moore, T. S., DeGrandpre, M. D., Sabine, C. L.,  
Ho, D. T., and Hargreaves, B. R.: Dissolved O<sub>2</sub>/Ar and other methods reveal rapid changes in productivity during a Lagrangian experiment  
in the Southern Ocean, *Journal of Geophysical Research: Oceans*, 117, 2012.
- 15 Johnson, K. S., Plant, J. N., Riser, S. C., and Gilbert, D.: Air Oxygen Calibration of Oxygen Optodes on a Profiling Float Array, *Journal of Atmospheric and Oceanic Technology*, 32, 2160–2172, 2015.
- Johnson, K. S., Plant, J. N., Coletti, L. J., Jannasch, H. W., Sakamoto, C. M., Riser, S. C., Swift, D. D., Williams, N. L., Boss, E., Haëntjens,  
N., Talley, L. D., and Sarmiento, J. L.: Biogeochemical sensor performance in the SOCCOM profiling float array, *Journal of Geophysical Research: Oceans*, 122, 6416–6436, 2017.
- 20 Kaiser, J., Reuer, M. K., Barnett, B., and Bender, M. L.: Marine productivity estimates from continuous O<sub>2</sub>/Ar ratio measurements by  
membrane inlet mass spectrometry, *Geophysical Research Letters*, 32, 2005.
- Kautsky, H.: Quenching of luminescence by oxygen, *Transactions of the Faraday Society*, 35, 216–219, 1939.
- Kinkade, C. S., Marra, J., Dickey, T. D., Langdon, C., Sigurdson, D. E., and Weller, R.: Diel bio-optical variability observed from moored  
sensors in the Arabian Sea, *Deep Sea Research Part II Topical Studies in Oceanography*, 1999.
- 25 Lueck, R. G.: Thermal Inertia of Conductivity Cells: Theory, *Journal of Atmospheric and Oceanic Technology*, 7, 741–755, 1990.
- Lueck, R. G. and Picklo, J. J.: Thermal Inertia of Conductivity Cells: Observations with a Sea-Bird Cell, *Journal of Atmospheric and Oceanic Technology*, 7, 756–768, 1990.
- Nicholson, D. P. and Feen, M. L.: Air calibration of an oxygen optode on an underwater glider, *Limnology and Oceanography: Methods*, 15,  
495–502, 2017.
- 30 Nicholson, D. P., Wilson, S. T., Doney, S. C., and Karl, D. M.: Quantifying subtropical North Pacific gyre mixed layer primary productivity  
from Seaglider observations of diel oxygen cycles, *Geophysical Research Letters*, pp. 4032–4039, 2015.
- Omand, M. M., Cetinić, I., and Lucas, A. J.: Using bio-optics to reveal phytoplankton physiology from a Wirewalker autonomous platform,  
*Oceanography*, 2017.
- Plant, J. N., Johnson, K. S., Sakamoto, C. M., Jannasch, H. W., Coletti, L. J., Riser, S. C., and Swift, D. D.: Net community production at  
35 Ocean Station Papa observed with nitrate and oxygen sensors on profiling floats, *Global Biogeochemical Cycles*, 30, 859–879, 2016.
- Proakis, J. G. and Monolakis, D. G.: *Digital Signal Processing: Principles, Algorithms, and Applications*, Prentice-Hall International, 3 edn.,  
1996.
- Riser, S. C. and Johnson, K. S.: Net production of oxygen in the subtropical ocean., *Nature*, 451, 323–325, 2008.
- Shay, L. K., Brewster, J. K., Jaimés, B., Gordon, C., Fennel, K., Furze, P., Fargher, H., and He, R.: Physical and Biochemical Structure  
40 Measured by APEX-EM Floats, *IEEE/OES Twelfth Current, Waves and Turbulence Measurement*, pp. 1–6, 2019.
- Steeman-Nielsen, E.: The use of radio-active carbon (C<sup>14</sup>) for measuring organic production in the sea, *ICES Journal of Marine Science*, 18,  
117–140, 1952.
- Tengberg, A., Hovdenes, J., Andersson, H. J., Brocandel, O., Diaz, R., Hebert, D., Arnerich, T., Huber, C., Körtzinger, A., Khripounoff,  
A., Rey, F., Rönning, C., Schimanski, J., Sommer, S., and Stangelmayer, A.: Evaluation of a lifetime-based optode to measure oxygen in  
45 aquatic systems, *Limnology and Oceanography: Methods*, 4, 7–17, 2006.



Thierry, V., Bittig, H., Gilbert, D., Kobayashi, T., Sato, K., and Schmid, C.: Processing Argo OXYGEN data at the DAC level, pp. 1–134, 2016.

50 Tortell, P. D., Asher, E. C., Ducklow, H. W., Goldman, J. A. L., Dacey, J. W. H., Grzymiski, J. J., Young, J. N., Kranz, S. A., Bernard, K. S., and Morel, F. M. M.: Metabolic balance of coastal Antarctic waters revealed by autonomous pCO<sub>2</sub> and ΔO<sub>2</sub>/Ar measurements, *Geophysical Research Letters*, 41, 6803–6810, 2014.

White, A. E., Barone, B., Letelier, R. M., and Karl, D. M.: Productivity diagnosed from the diel cycle of particulate carbon in the North Pacific Subtropical Gyre, *Geophysical Research Letters*, 44, 3752–3760, 2017.

Wiener, N.: *Extrapolation, Interpolation, and Smoothing of Stationary Time Series*, The MIT Press, 1964.

Winkler, L.: The determination of dissolved oxygen in water, *Ber. Deutsch Chem. Gos.*, 21, 2843–2855, 1888.
